# Supplementary material for: Associations among drug acquisition and use behaviors, psychosocial attributes, and opioid-involved overdoses
Source: PubMed Central journal article supplement (PMC11197316; doi:10.1186/s12889-024-19217-y), 2024-06-25
Supplement: 12889_2024_19217_MOESM1_ESM.pdf [file 12889_2024_19217_MOESM1_ESM.pdf]

**Supplemental Table 1. Alternate SEM Models of Overdose Risk: Descriptions and Fit Statistics**

| Description                                                                                                                                                                                                                                   | Psychosocial/Demographic Variables Included                                                                                                           | Free Parameters | Fit Statistics               |       |                                   |
|-----------------------------------------------------------------------------------------------------------------------------------------------------------------------------------------------------------------------------------------------|-------------------------------------------------------------------------------------------------------------------------------------------------------|-----------------|------------------------------|-------|-----------------------------------|
|                                                                                                                                                                                                                                               |                                                                                                                                                       |                 | Chi-Square Test of Model Fit | CFI   | TLI                               |
| Demographic and psychosocial variables as independent predictors of past-year overdose, with both direct and indirect effects mediated by both drug-related latent risk factors; direct effects of both drug-related latent factors included. | Age, Education, Marital Status, Gender, Racial/Ethnic Minority Status, Past-Year Injection Use, Homelessness, Serious Mental Illness, Trauma Exposure | 53              | 148.663 (df=133, p = .17)    | 0.975 | 0.967 .021 (95% CI = .000 - .037) |
| Demographic and psychosocial variables as independent predictors of past-year overdose, with indirect effects only, mediated by both drug-related latent risk factors; direct effects of both drug-related latent factors included.           | Age, Education, Marital Status, Gender, Racial/Ethnic Minority Status, Past-Year Injection Use, Homelessness, Serious Mental Illness, Trauma Exposure | 46              | 156.594 (df = 132, p = .07)  | 0.961 | 0.952 .026 (95%CI = .000 - .041)  |
| Reduced set of demographic and psychosocial variables as independent predictors with indirect effects only, mediated by drug use latent risk factor; direct effect of drug acquisition latent factor removed.                                 | Age, Homelessness, Serious Mental Illness, Trauma Exposure                                                                                            | 34              | 130.388 (df = 96, p = .01)   | 0.945 | 0.935 .036 (95%CI = .018 - .051)  |
| Psychosocial variables combined into a single latent factor with a direct effect and indirect effects on overdose, mediated by both drug use latent factors; direct effects from both drug-related factors on overdose.                       | Homelessness, Serious Mental Illness, Trauma Exposure                                                                                                 | 35              | 99.438 (df = 85, p = .14)    | 0.983 | 0.979 .025 (95%CI = .000 - .044)  |
| Psychosocial variables combined into a single latent factor with indirect effects on overdose, mediated by both drug use latent factors but no direct effect; direct effects from both drug-related factors on overdose.                      | Homelessness, Serious Mental Illness, Trauma Exposure                                                                                                 | 41              | 99.27 (df = 100, p = .16)    | 0.984 | 0.981 .024 (95% CI = .000 - .043) |

**Note.** CFI = comparative fit index ; TLI = Tucker-Lewis index ; RMSEA = root mean square error of approximation ; The sample N for all models was 270.
