# Supplementary material for: Associations among drug acquisition and use behaviors, psychosocial attributes, and opioid-involved overdoses
Source: PubMed Central journal article supplement (PMC11197316; doi:10.1186/s12889-024-19217-y), 2024-06-25
Supplement: 12889_2024_19217_MOESM2_ESM.pdf [file 12889_2024_19217_MOESM2_ESM.pdf]

**Supplemental Table 2. Zero Order Correlations Among Modeled Variables**

|                                          | 1     | 2      | 3     | 4     | 5     | 6     | 7     | 8     | 9     | 10    | 11     | 12    | 13    |
|------------------------------------------|-------|--------|-------|-------|-------|-------|-------|-------|-------|-------|--------|-------|-------|
| <b>Demographics</b>                      |       |        |       |       |       |       |       |       |       |       |        |       |       |
| <b>Psychosocial Factors</b>              |       |        |       |       |       |       |       |       |       |       |        |       |       |
| 1. Trauma exposure                       | -     |        |       |       |       |       |       |       |       |       |        |       |       |
| 2. Housing                               | 0.167 | -      |       |       |       |       |       |       |       |       |        |       |       |
| 3. Serious psychological distress        | 0.305 | 0.277  | -     |       |       |       |       |       |       |       |        |       |       |
| <b>Drug Acquisition/Contextual Risks</b> |       |        |       |       |       |       |       |       |       |       |        |       |       |
| 4. Used with new people                  | 0.298 | 0.351  | 0.263 | -     |       |       |       |       |       |       |        |       |       |
| 5. New supplier                          | 0.341 | 0.280  | 0.277 | 0.691 | -     |       |       |       |       |       |        |       |       |
| 6. Used in new location                  | 0.293 | 0.307  | 0.277 | 0.794 | 0.710 | -     |       |       |       |       |        |       |       |
| <b>Drug Use Risks</b>                    |       |        |       |       |       |       |       |       |       |       |        |       |       |
| 7. Used different amounts                | 0.223 | 0.142  | 0.379 | 0.380 | 0.528 | 0.394 | -     |       |       |       |        |       |       |
| 8. Used alone                            | 0.089 | -0.097 | 0.000 | 0.249 | 0.375 | 0.203 | 0.410 | -     |       |       |        |       |       |
| 9. Prefers fentanyl                      | 0.284 | 0.120  | 0.294 | 0.302 | 0.199 | 0.180 | 0.318 | 0.384 | -     |       |        |       |       |
| 10. Used multiple drugs                  | 0.143 | 0.126  | 0.265 | 0.445 | 0.319 | 0.368 | 0.333 | 0.420 | 0.313 | -     |        |       |       |
| 11. Used with benzodiazepines            | 0.235 | 0.113  | 0.267 | 0.304 | 0.263 | 0.213 | 0.206 | 0.183 | 0.358 | 0.623 | -      |       |       |
| 12. Used with alcohol                    | 0.139 | 0.063  | 0.053 | 0.428 | 0.356 | 0.189 | 0.248 | 0.278 | 0.157 | 0.561 | 0.173  | -     |       |
| 13. Used different way                   | 0.096 | 0.027  | 0.188 | 0.316 | 0.316 | 0.284 | 0.439 | 0.469 | 0.278 | 0.296 | 0.392  | 0.279 | -     |
| 14. First use in awhile                  | 0.195 | 0.081  | 0.074 | 0.187 | 0.110 | 0.193 | 0.120 | 0.255 | 0.192 | 0.196 | -0.025 | 0.146 | 0.378 |
