# Supplementary material for: Associations among drug acquisition and use behaviors, psychosocial attributes, and opioid-involved overdoses
Source: PubMed Central journal article supplement (PMC11197316; doi:10.1186/s12889-024-19217-y), 2024-06-25
Supplement: 12889_2024_19217_MOESM3_ESM.pdf [file 12889_2024_19217_MOESM3_ESM.pdf]

**Supplemental Table 3. Unstandardized Parameter Estimates and R-square Results for the Selected SEM Structural Model**

|                                  |                                                                         | Estimate | S.E.  | Sig. | R-square | Sig |
|----------------------------------|-------------------------------------------------------------------------|----------|-------|------|----------|-----|
| <b>Drug Acquisition Risk by:</b> |                                                                         |          |       |      |          |     |
|                                  | Used with new people                                                    | 1.000    | 0.000 | -    | 0.837    | *** |
|                                  | Used in a new location                                                  | 0.921    | 0.072 | ***  | 0.711    | *** |
|                                  | Had new source/supplier                                                 | 0.895    | 0.067 | ***  | 0.670    | *** |
| <b>Drug Use Risk by:</b>         |                                                                         |          |       |      |          |     |
|                                  | Used different amounts                                                  | 1.000    | 0.000 | -    | 0.435    | *** |
|                                  | Used alone                                                              | 0.750    | 0.182 | ***  | 0.245    | *   |
|                                  | Used multiple drugs                                                     | 1.151    | 0.163 | ***  | 0.577    | *** |
|                                  | Used with benzodiazepines                                               | 0.862    | 0.162 | ***  | 0.324    | **  |
|                                  | Used with alcohol                                                       | 0.832    | 0.142 | ***  | 0.301    | *** |
|                                  | Used in a different way                                                 | 0.840    | 0.168 | ***  | 0.307    | *** |
|                                  | First use in a while                                                    | 0.487    | 0.157 | ***  | 0.103    | NS  |
|                                  | Fentanyl preference                                                     | 0.730    | 0.174 | ***  | 0.232    | *   |
| <b>Psychosocial Risk by:</b>     |                                                                         |          |       |      |          |     |
|                                  | Trauma exposure                                                         | 1.000    | 0.000 | -    | 0.266    | *   |
|                                  | Homelessness                                                            | 0.865    | 0.268 | ***  | 0.199    | **  |
|                                  | Serious psychological distress                                          | 1.075    | 0.299 | ***  | 0.307    | *   |
|                                  | <b>Drug Acquisition Risk on Psychosocial Risk</b>                       | 1.212    | 0.348 | ***  | -        |     |
|                                  | <b>Drug Use Risk on Psychosocial Risk</b>                               | 0.726    | 0.24  | **   | -        |     |
| <b>Past-Year Overdose on:</b>    |                                                                         |          |       |      |          |     |
|                                  | Drug acquisition risk                                                   | 0.114    | 0.155 | NS   | -        |     |
|                                  | Drug use risk                                                           | 0.434    | 0.218 | *    | -        |     |
|                                  | <b>Drug Acquisition Risk with Drug Use Risk</b>                         | 0.153    | 0.079 | NS   | -        |     |
|                                  | <b>Total Indirect Effect of Psychosocial Risk on Past-Year Overdose</b> | 0.454    | 0.176 | **   | -        |     |
|                                  | <b>Any Past-Year Overdose</b>                                           | -        | -     |      | 0.131    | *   |

**Note.** Figures shown are unstandardized parameter estimates, standard errors, and the r-square statistic based on the final SEM structural model.

- = Not estimated; NS = Non-significant; \* = < .05; \*\* = < .01; \*\*\* = < .001.
